# Supplementary material
Source: publisher figshare collection journal article supplement (https://karger.figshare.com/ndownloader/files/25508354)
Supplement: Supplementary file 1 [file 25508354]

Supplemental table 1. Adjusted quality assessment of included studies using the Newcastle-Ottawa Scale for assessing the quality of cohort studies.

|  | De Jong et al | Machens et al | Baumgarten et al | Yu et al | Elfenbein et al | Cohen et al | Breuer et al | Peroni et al | Chiapponi et al | Sherman et al | Bergman et al | Sugino et al | Akkari et al | Chen et al | Sinha et al | Lobe et al | Nordenstrom et al | Perzik et al | Raval et al | Soreide et al | Witte et al | Zobel et al |
| --- | --- | --- | --- | --- | --- | --- | --- | --- | --- | --- | --- | --- | --- | --- | --- | --- | --- | --- | --- | --- | --- | --- |
| **Selection** |  | | | | | | | | | | | | | | | | | | | | | |
| Representativeness of the exposed cohort | **** | **** | **** | **** | **** | **** | **** | **** | **** | **** | **** | **** | **** | **** | **** | **** | **** | **** | **** | **** | **** | **** |
| Selection of the non-exposed cohort | Not applicable | | | | | | | | | | | | | | | | | | | | | |
| Ascertainment of exposure | **** | **** | **** | **** | **** | **** | **** | **** | **** | **** | **** | **** | **** | **** | **** | **** | **** | **** | **** | **** | **** | **** |
| Demonstration that outcome of interest was not present at start of study | - | **** | **** | - | - | - | **** | **** | **** | - | - | - | - | - | **** | - | **** | - | - | - | - | - |
| **Comparability** |  | | | | | | | | | | | | | | | | | | | | | |
| Comparability of cohorts on the basis of the design or analysis | Not applicable | | | | | | | | | | | | | | | | | | | | | |
| **Outcome** |  | | | | | | | | | | | | | | | | | | | | | |
| Assessment of outcome | **** | **** | **** | **** | **** | **** | **** | **** | **** | **** | **** | **** | **** | **** | **** | **** | **** | **** | **** | **** | **** | **** |
| Was follow-up long enough for outcomes to occur | **** | **** | **** | **** | **** | **** | **** | **** | **** | **** | **** | **** | **** | **** | **** | **** | **** | **** | **** | **** | **** | **** |
| Adequacy of follow up of cohorts | - | **** | - | **** | - | **** | - | **** | - | **** | **** | **** | - | **** | **** | - | **** | - | **** | **** | **** | **** |
